# Supplementary material for: Strong wind occurrence in Poland from the 13th to 16th centuries based on documentary evidence
Source: Copernicus journal article supplement (doi:10.5194/egusphere-2025-1042), 2025-04-02
Supplement: Supplementary file [file egusphere-2025-1042-AC1-supplement.pdf]

Dear Editor

We would like to thank you and the two anonymous reviewers for providing positive feedback and constructive comments about our manuscript. We believe that these comments helped us improve the description of our work.

All comments were carefully considered, and the detailed corrections/modifications are listed below, point by point. In addition, the manuscript was reviewed by a native speaker to meet the journal's required English standard.

Reviewer's comments (RC1) are in black, [our answers in blue font](#).

RC1: 'Comment on egusphere-2025-1042', Anonymous Referee #1, 30 Apr 2025

I think this paper is needed and it is very important and a useful starting point for the scientific community. Wind is still relatively under-researched, and every field has to start somewhere. I believe this was a strong beginning for the topic.

[Thank you very much.](#)

It's a good idea overall.

[Thank you very much.](#)

There's no need to include the word enlightenment (line 99).

[Was deleted.](#)

I like the division into the three categories of wind and how they are described — I hope this classification can become generally accepted.

[Thank you very much.](#)

The database is very useful — great initiative!

[Thank you very much.](#)

Table 1 is a good example.

[Thank you very much.](#)

Figure 2 could benefit from a clearer caption. This applies to several figures — more self-explanatory captions would improve them (e.g., Figures 3, 12, and 13).

[Thank you for your suggestion.](#)

[Changes introduced are the following:](#)

[Fig. 2 – We revised the caption to:](#)

[Fig. 2. Number \(n\) of weather notes for Poland for seasons \(a\) and regions \(b\), 1281–1600. Explanation: “N/A season” – specific season is not available \(unknown\); the category “Poland” encompasses all notes for which the region is unknown](#)

[We trust that this addresses the issues the reviewer was picking up on.](#)

[The caption for Figure 3 has been revised to:](#)

Fig. 3. Decadal (a) and 50-year (b) number of occurrences [n] of strong winds of all categories in Poland, 1281–1600.

And similar other figure captions have been revised in line with Figure 3.

We modified captions in Figures 11-13.

Fig. 11. Year-to-year course of the annual number [n] of gust winds of  $>17 \text{ ms}^{-1}$  at selected stations representing six studied regions in Poland, 1993–2022

Fig. 12. Annual course based on the average monthly number [n] of gust winds of  $>17 \text{ ms}^{-1}$  at selected stations representing six studied regions in Poland, 1993–2022

Fig. 13. Maximum monthly wind gust speeds ( $\text{ms}^{-1}$ ) at selected stations representing six studied regions in Poland, 1993–2022

The comparison with the contemporary period is a bit poorly explained and could be clarified.

Thank you for your suggestion. Some new additional information has been added.

Figure 4 is very good.

Thank you very much.
